# A mechanical model of ocular bulb vibrations and implications for acoustic tonometry

Nicoletta Tambroni<sup>1</sup>, Giuseppe Tomassetti<sup>2\*</sup>, Silvia Lombardi<sup>3</sup>, Rodolfo Repetto<sup>1</sup>

**1** Department of Civil, Chemical and Environmental Engineering, University of Genoa, Genoa, Italy

**2** Dipartimento di Ingegneria, Industriale, Elettronica e Meccanica, Rome 3 University, Rome, Italy

**3** Gran Sasso Science Institute, L'Aquila, Italy

\*giuseppe.tomassetti@uniroma3.it

## Abstract

In this study, we propose a comprehensive mechanical model of ocular bulb vibrations and discuss its implications for acoustic tonometry. The model describes the eye wall as a spherical, pre-stressed elastic shell containing a viscoelastic material and accounts for the interaction between the elastic corneoscleral shell and the viscoelastic vitreous humor. We investigate the natural frequencies of the system and the corresponding vibration modes, expanding the solution in terms of scalar and vector spherical harmonics. Our findings reveal the significant role of intraocular pressure (IOP) and ocular rigidity in influencing vibration frequencies, while the vitreous rheological properties primarily affect damping. This study contributes to the understanding of the mechanical behavior of the eye under dynamic conditions, with potential implications for non-contact intraocular pressure measurement techniques such as acoustic tonometry. The model can also be relevant for other ocular pathological conditions, such as traumatic retinal detachment, which are believed to be influenced by the dynamic behavior of the eye.

## Introduction

The human eye is the organ that allows us to perceive visual information of the world around us. The shell enclosing the ocular bulb consists of three layers, with different functions. The most external one is the fibrous corneo-scleral shell, which supports the mechanical loads acting on the organ. The vascular middle layer is the uvea, which consists of the iris, the ciliary body and the choroid. Finally, the innermost layer is the retina, which is the nervous tunic, where the photoreceptors are located. The interior of the eye is made of three chambers: the anterior chamber, the posterior chamber and the vitreous chamber (Figure 1). The first is located between the cornea and the iris, the second is between the iris and the lens, and the third is delimited anteriorly by the lens and posteriorly by the retina. The anterior and posterior chambers are connected through the pupil and contain aqueous humor, a liquid with properties very similar to water. The vitreous chamber contains a gel, the vitreous humor, with viscoelastic properties [1].

The eye is a pressurized organ and the intraocular pressure (IOP) is responsible for the main mechanical loads acting on the corneo-scleral shell under physiological

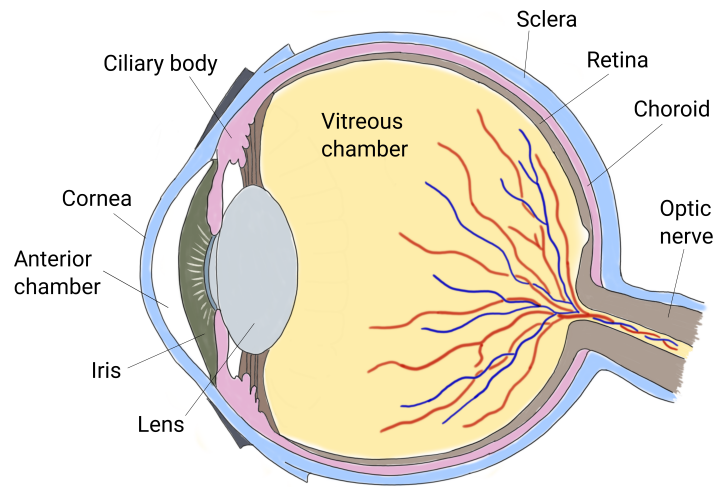

**Fig 1.** Sketch of a cross-section of the human eye.

{fig:s

conditions. IOP is regulated by a delicate balance between rate of aqueous production by the ciliary body [2] and resistance to its drainage at the junction between the cornea and the iris, mostly through a spongy tissue named trabecular meshwork [3]. IOP has a significant impact on the functioning of the eye and is involved in the onset and development of various pathological conditions. Most notably, elevated IOP increases the risk of developing glaucoma, a collection of eye conditions that can cause damage to the optic nerve and can result in vision loss [4].

Standard methods to measure IOP (contact tonometry methods) exploit the principle that the force required to deform the cornea by appplanation or indentation increases with increasing IOP. The gold standard instrument in contact tonometry is the Goldmann appplanation tonometer, which uses a probe to flatten a portion of the cornea and infers the IOP from the required force. Non-contact tonometers are also presently in use, which employ an air puff to flatten the cornea [5,6]. A detailed review of the techniques presently in use to measure IOP and the underlying physical principles is reported in [7].

A promising, non-contact IOP measurement technique, which has been investigated since the late seventies [8], is acoustic tonometry. The general idea is to excite vibrations of the eye bulb with acoustic waves and measuring its response, from which it is possible to infer the natural vibrations frequencies of the eye and their damping ratio. These, in turn, are affected by IOP [8–13]. Although the preliminary results obtained adopting these techniques suggest that they have a great potential, none of such approaches has made its way to the clinical practice yet.

Reliability of acoustic methods would certainly benefit from a better understanding of the mechanical behavior of the eye under dynamic conditions. In fact, the natural frequencies of the eye and their damping do not only depend on IOP, but also on a number of other factors, such as mechanical properties and thickness of the corneoscleral shell, elasticity and viscosity of the vitreous body, size of the eye bulb, etc.

A better understanding of the dynamical response of the eye may also have an impact in other areas related to pathological conditions of the eye. For instance, retinal detachment is often a consequence of trauma or of vitreo-retinal tractions, which are both, to some extent, influenced by the dynamical behavior of the eye bulb and of the vitreous body [14–17]. It has been suggested that, due to its viscoelastic behavior, the vitreous body might serve as a mechanical damper for the eye, thus absorbing impacts, and protecting the lens and retina against mechanical injury [1]. In this respect,

understanding the role of vitreous mechanical properties on ocular bulb dynamics provides useful information on how vitreous aging and vitreous replacement with tamponade substitutes would impact on tractions on the retina.

There is extensive literature on mathematical modeling of spherical shells vibrations, which dates back to some classical works of the nineteenth century [18,19]. The effect of a fluid filling an elastic sphere on its vibration frequencies has been first considered by [20] and various further papers have been published since. A recent contribution that also summarizes previous results is [21]. The authors studied theoretically small oscillations of a pressurized, elastic, spherical shell subject to internal and external fluid effects.

Some authors have also studied theoretically or numerically the vibrations of a fluid-filled shell, specifically considering the problem of ocular bulb vibrations. In [22], the eye was modeled as an elastic shell, representing corneo-scleral shell, described with a realistic geometry. The shell was filled with an inviscid and incompressible fluid, representing the vitreous humor. The resulting model was solved using the finite-element method to compute the vibration modes of the eye and the dependence of resonant frequencies on IOP.

Salimi et al. [23] computed the natural frequencies of the eye using the finite-element method. They first described the eye as a spherical shell containing a fluid and then proposed an anatomically more accurate model. They also validated their numerical predictions against results from experimental tests.

Aloy et al. [24] proposed various models of the eye with increasing complexity and computed the oscillation frequencies of the system, with the aim of indirectly estimating the mechanical properties of ocular tissues. They first modeled the eye globe as a homogeneous sphere, then accounted for the presence of an outer stiffer layer (the corneo-scleral shell) and, finally, modeled the cornea and sclera as distinguished tissues, with different mechanical properties.

Shih and Guo [25] also studied the natural modes of oscillation of the ocular bulb, described as a spherical elastic shell filled with an inviscid fluid. The theoretical model proposed in [25] is obtained by adapting the equations that govern the equilibrium of a pre-stretched plate to a spherical geometry.

In this paper, we study coupled vibrations of the vitreous humor and corneo-scleral shell, modeling the former as a linear, viscoelastic, incompressible material, and the latter as a thin elastic spherical shell. In spite of the idealizations it is based on, our approach improves over previous works in various respects. We account for the effect of pre-stress of the shell in a formally correct manner and this leads to governing equations for the shell that are slightly different from those derived in previous works.

We also consider the viscoelasticity of the vitreous body, which was invariably neglected in all previous contributions (in most cases the vitreous body was simply described as an inviscid fluid). This is likely to have an important effect, particularly on the damping properties of the system.

With these ingredients, we compute the resonant frequencies and the vibration modes of the eyeball, highlighting the role of IOP, stiffening of the sclera, and damping associated to the viscoelastic behavior of the vitreous. This allows us to assess the importance of pressure and stiffening on the resonant frequencies, as well as effect of the rheological properties of the enclosed fluid on the damping rate. The importance of these effects is discussed in the final section of this paper, where we summarize our main findings.

## Materials and methods

### Formulation of the mathematical model

To compute the vibration properties of the eyebulb we have developed an analytical model, where the eyebulb is described as an elastic pre-stressed, spherical shell (the corneo-scleral shell) filled with an incompressible viscoelastic material (the vitreous humor).

The equations that govern the motion in the interior of the eyebulb are the standard ones for linear viscoelasticity, (1). They have been used in [15] to characterize the vibrations of the vitreous body, under the assumption that the cornea was rigid.

For the shell we use the coordinate-free approach developed in [26] [26] and we adopt the equations of motion for a pressurized spherical shell, (2), developed therein. We refer to [26] and to the supplementary material for additional information concerning the shell model.

The two models (vitreous and corneo-scleral shell) are coupled using the no-slip condition and also assuming that the shell is loaded by the traction locally exerted by the inner viscoelastic material. More in detail, we consider an equilibrium state where the eyebulb is at rest, with an internal constant pressure  $p$ . The corneoscleral shell is thus in a stressed state, described by membrane force-tensor  $\mathring{\mathbf{N}} = \frac{pR}{2}\mathbf{P}$ , where  $\mathbf{P} = \mathbf{I} - \mathbf{n} \otimes \mathbf{n}$ , with  $\mathbf{I}$  the identity tensor and  $\mathbf{n}$  the outward unit normal, is the projector on the tangent plane to the shell. Note that in this state the bending moment vanishes.

Small-amplitude vibrations are described by a displacement field  $\mathbf{u}(\mathbf{x}, t)$ . In the vitreous humor, the displacement obeys the motion equations

$$\begin{aligned} \rho_v \ddot{\mathbf{u}} &= \text{div } \mathbf{S}, \\ \text{div } \mathbf{u} &= \mathbf{0}, \end{aligned} \tag{1} \quad \{\text{eq: eq}\}$$

where each superimposed dot represents partial differentiation with respect to time,  $\rho_v$  is the density of the vitreous humor and  $\mathbf{S}$  is the *increment of the nominal (Piola) stress*. On the corneoscleral shell, the normal and tangential components of the displacement, respectively,  $w = \mathbf{n} \cdot \mathbf{u}$  and  $\mathbf{v} = \mathbf{P}\mathbf{u}$ , obey the motion equations

$$\begin{aligned} \rho_s h \ddot{w} &= \text{div}_s(\mathbf{P} \text{div}_s \mathbf{M}) - \frac{1}{R} \mathbf{P} \cdot \mathbf{N} + \frac{p}{2} R \Delta_s w - \frac{p}{2} \text{div}_s \mathbf{v} - \mathbf{n} \cdot \mathbf{S} \mathbf{n}, \\ \rho_s h \ddot{\mathbf{v}} &= \mathbf{P} \text{div}_s \mathbf{N} + \frac{1}{R} \mathbf{P}(\text{div}_s \mathbf{M}) - \mathbf{P} \mathbf{S} \mathbf{n}, \end{aligned} \tag{2} \quad \{\text{balan}\}$$

where  $\mathbf{N}$  and  $\mathbf{M}$  are the increments of the *nominal membrane-force tensor* and *bending-moment tensor*. On the right-hand sides of Eqs. (2), the last term represent the force per unit reference area exerted by the vitreous humor on the corneoscleral shell. Moreover, the first term on the right-hand sides of the same equation set represents the extra contribution due to the shell pre-tension due to the IOP.

Within the vitreous, we adopt the following constitutive equation for the incremental nominal stress:

$$\mathbf{S} = p \nabla \mathbf{u}^\top + \boldsymbol{\Sigma}, \tag{3} \quad \{\text{eq: 1}\}$$

where

$$\boldsymbol{\Sigma} = -q \mathbf{I} + 2 \int_{-\infty}^t G(t-s) \mathbf{D}(s) ds, \tag{4} \quad \{\text{eq: 4}\}$$

with  $q$  the pressure increment and  $\mathbf{D} = \text{dev}(\text{sym} \nabla \dot{\mathbf{u}})$  the strain rate. The first term on the right-hand side of (3) accounts for the pre-compression associated to the IOP. An explanation of the nature of this term in connection with the definition of nominal stress may be found in [27].

The stress relaxation function  $G(t)$  embodies the information of the material that fills the cavity, in response to a stress relaxation test. For an elastic material,  $G(t)$  is proportional to the Heaviside function; for a viscous fluid,  $G(t)$  is proportional to the Dirac delta centered at the origin [28]. In the case of harmonic motion, the properties of the stress relaxation function are encoded in the complex modulus

$$G(\zeta) = \zeta \int_0^{\infty} e^{-\zeta\tau} G(\tau) d\tau. \quad (5) \quad \{\text{eq: } \kappa\}$$

We assume that the stress-response function of the vitreous can be described with the Kelvin-Voigt model (a linear spring and a dashpot arranged in parallel), so that

$$G(\zeta) = \gamma + \zeta\eta, \quad (6) \quad \{\text{eq: } \kappa\}$$

where  $\gamma$  is the shear modulus and  $\eta$  is the viscosity.

For the corneoscleral shell we adopt the constitutive equations

$$\begin{aligned} \mathbf{N} &= \frac{pR}{2} \nabla \mathbf{u} + h(2\mu\boldsymbol{\varepsilon} + \tilde{\lambda}(\text{tr } \boldsymbol{\varepsilon})\mathbf{P}) + \frac{1}{R}\mathbf{M}, \\ \mathbf{M} &= \frac{h^3}{12}(2\mu\boldsymbol{\kappa} + \tilde{\lambda}(\text{tr } \boldsymbol{\kappa})\mathbf{P}), \end{aligned} \quad (7) \quad \{\text{eq: } 7\}$$

where

$$\begin{aligned} \boldsymbol{\varepsilon} &= \frac{1}{2}(\mathbf{P}\nabla_s \mathbf{v} + \nabla_s \mathbf{v}^T \mathbf{P}) + \frac{w}{R}\mathbf{P}, \\ \boldsymbol{\kappa} &= -\mathbf{P}\nabla_s \nabla_s w + \frac{1}{R}\mathbf{P}\nabla_s \mathbf{v} + \frac{1}{R}\nabla_s \mathbf{v}^T \mathbf{P} + \frac{w}{R^2}\mathbf{P}, \end{aligned} \quad (8) \quad \{\text{eq: } 8\}$$

are, respectively, the in-plane stretch and bending tensors. Equations (2), (7) and (8) follow from a systematic linearization of the equations that govern the dynamics of non-linear elastic shells

The equations that govern the dynamics of an empty or a fluid-filled spherical shell have been derived and studied by several authors. Lamb [30] studied the small-amplitude vibrations of a thin spherical shell by fully solving the dynamical equations of elasticity in a domain bounded between two concentric spherical surfaces. The vibrations of an elastic spherical shell containing a fluid have been studied first by Love [31], then by Rand and DiMaggio [32] by Engin and Liu [33], and by Bai and Wu [34]. The effect of viscosity of the enclosed fluid has been investigated by Su [35].

The explicit contribution of an initial pressure to the motion of the shell has been considered by Kuo et al. [36] and by Shih and Guo [37]. In both cases, the initial pressure results into an extra term that adds up to the restoring elastic forces. Kuo et al. [36] take as starting point the equations that govern the axisymmetric motions of a spherical shell and introduce the restoring force due to the pre-stress by an insightful ad-hoc argument. Shih and Guo [37], instead, take as starting point the equations of a pre-stressed membrane taken from [38], and take into account the effect of curvature replacing the Laplacian operator of the membrane with the Laplace-Beltrami operator. Compared with these two references, our approach to the calculation of the extra restoring force due to the IOP is based on a systematic linearization of the nonlinear equation of motions derived in [26], and yields slightly different equations. In particular, in our case the initial pre-stress affects also the tangential motion of the shell. However, the extra contribution of the normal component of the displacement that appears in our motion equations (see the Supplementary Material), proportional to the surface Laplacian  $\Delta_s$  of the normal displacement, coincides with that of Kuo et al. [36] and that of Shih and Guo. [37].

## Parameter values

All parameter values that have been used in the model are reported in Table 1.

Jesus et al. [39] measured the scleral radius through an approximation of the topographical scleral data to a sphere and found the value of  $11.2 \pm 0.3$  mm, which is what we use in the model.

The thickness of the sclera is highly variable from point to point, ranging from 0.50 mm at the limbus to 0.95 mm at the posterior pole (see Table 1). The thickness of the central cornea is approximately 0.56 mm. In our model the corneo-scleral shell is modeled as a constant thickness structure, and we have adopted the value 0.5 mm, which is in line with the value chosen in related studies [25].

| Parameter                         | Value                                                                                                                                                                                                          | Reference |
|-----------------------------------|----------------------------------------------------------------------------------------------------------------------------------------------------------------------------------------------------------------|-----------|
| Radius of curvature of the sclera | $11.2 \pm 0.3$                                                                                                                                                                                                 | [39]      |
| Thickness of the sclera           | 0.50 $\pm$ 0.11 mm limbus<br>0.43 $\pm$ 0.14 mm ora serrata<br>0.42 $\pm$ 0.15 mm equator<br>0.65 $\pm$ 0.15 mm posterior region<br>0.95 $\pm$ 0.18 mm posterior pole<br>0.86 $\pm$ 0.21 mm optic nerve region | [40]      |
| Thickness of the cornea           | $0.561 \pm 0.026$ mm                                                                                                                                                                                           | [41]      |
| Density of the sclera             | $1077 \pm 5$ kg/m <sup>3</sup>                                                                                                                                                                                 | [42]      |
| Density of the cornea             | $1058 \pm 7$ kg/m <sup>3</sup>                                                                                                                                                                                 | [42]      |
| Shear modulus of the vitreous     | 10 Pa                                                                                                                                                                                                          | [43, 44]  |
| Viscosity of the vitreous $\eta$  | 0.39 Pa · s                                                                                                                                                                                                    | [43, 44]  |
| Ocular rigidity                   | $0.021 \mu\text{l}^{-1}$                                                                                                                                                                                       | [45, 46]  |
| Physiological IOP                 | 15 mmHg                                                                                                                                                                                                        | [47]      |

**Table 1.** Experimental values of the parameters.

Densities of the sclera and cornea have been taken equal to 1077 and 1058 kg/m<sup>3</sup>, respectively [42].

The viscoelastic properties of the vitreous have been measured by several authors; see Table 1 in [1]. Most authors have characterized vitreous properties through the complex modulus  $G$ , defined by equation (5). In this work we interpret the rheological tests using the Kelvin-Voigt model (6) and adopt the values of  $\gamma = 10$  Pa and  $\eta = 0.39$  Pa · s, that are derived from measurements by [43] (see Table 1 in [44]).

We finally need to specify the values of the parameters  $\mu$  and  $\tilde{\lambda}$ . In conventional engineering theories, these parameters are the shear modulus and the effective first Lamé constant. They are given by

$$\mu = \frac{E}{2(1 + \nu)} \quad \text{and} \quad \tilde{\lambda} = \frac{2E\nu}{1 + \nu}, \quad (9)$$

where  $E$  and  $\nu$  are, respectively, the Young's modulus and the Poisson's ratio. The constant  $\tilde{\lambda}$  represents a correction to the Lamé parameter  $\lambda = \frac{E\nu}{(1+\nu)(1-2\nu)}$ , that accounts for the fact that a thin shell is in a plane stress state. If the material is incompressible, then  $\nu = 0.5$  and (9) become  $\mu = \frac{1}{3}E$  and  $\tilde{\lambda} = \frac{2}{3}E$ , so that

$$\tilde{\lambda} = 2\mu. \quad (10)$$

It would be tempting to employ (9) or (10) to fit our parameters, employing the available measurements of the Young's modulus and Poisson's ratio of the cornea. However, the available data are scattered and, moreover, the outer shell of the eye is

It is made available under a [CC-BY 4.0 International license](https://creativecommons.org/licenses/by/4.0/).

highly anisotropic and non-homogeneous. In addition, one should consider that the mechanical and geometrical properties of the cornea are significantly different from those of the sclera [48, 49].

For the aforementioned reasons, we have opted for fitting the parameters  $\mu$  and  $\tilde{\lambda}$  using measurements from inflation tests that provide a global estimate of the bulb mechanical properties, somehow averaging over the spatial variability of tissue properties. Friedenwald [45] proposed the following empirical law to link the ocular volume  $V$  to IOP  $p$

$$\log\left(\frac{p}{p_0}\right) = K(V - V_0), \quad (11)$$

where  $p_0$  and  $V_0$  are the corresponding reference values, and  $K$  is a constant called *ocular rigidity*. Friedenwald [45] estimated the ocular rigidity to be  $0.021 \mu\text{l}^{-1}$ .

It follows from (11) that  $\frac{dp}{dV} = Kp$ , and hence

$$\frac{dp}{dR} = 4\pi R^2 Kp. \quad (12)$$

For a sphere of radius  $R$ , a uniform increment  $dR$  of the radius corresponds to a normal displacement  $w = dR$  and to a tangential displacement  $\mathbf{v} = \mathbf{0}$ . Thus, by (8), the stretching and bending strains are, respectively,

$$\boldsymbol{\varepsilon} = \frac{dR}{R} \mathbf{P}, \quad \boldsymbol{\kappa} = \frac{dR}{R^2} \mathbf{P}. \quad (13)$$

Neglecting bending moments, the increment of the nominal membrane force tensor is, according to the constitutive equation (7),

$$\mathbf{N} = \left(\frac{pR}{2} + 2h(\mu + \tilde{\lambda})\right) \frac{dR}{R} \mathbf{P}. \quad (14)$$

The corresponding increment of nominal traction (force per reference unit area) is  $\mathbf{b} = (dp + p\frac{dR}{R})\mathbf{n}$ , thus, the equilibrium equation in the normal direction (see (2)) yields

$$-\left(p + 4\frac{h}{R}(\mu + \tilde{\lambda})\right) \frac{dR}{R} + dp + p\frac{dR}{R} = 0, \quad (15)$$

whence

$$\frac{dp}{dR} = 4\frac{h}{R^2}(\mu + \tilde{\lambda}), \quad (16)$$

which corresponds to

$$\frac{dV}{dp} = \frac{\pi R^4}{h(\mu + \tilde{\lambda})} = C, \quad (17)$$

where  $C$  is ocular compliance. Comparison of (12) and (16) yields

$$\mu + \tilde{\lambda} = \pi \frac{R^4}{h} Kp, \quad C = \frac{1}{Kp}. \quad (18)$$

Since the sclera is an almost incompressible material, we assume that the Poisson coefficients be equal to 0.5. Then, (10) and (18) yield

$$\mu = \frac{\pi}{3} R^3 Kp. \quad (19)$$

As a consequence, the value of the Young's modulus that results from (9) and (19) is given by

$$E = \pi \frac{R^4}{h} Kp, \quad (20)$$

It is made available under a [CC-BY 4.0 International license](https://creativecommons.org/licenses/by/4.0/).

in agreement with [50]. In particular, taking  $R = 11.2$  mm,  $h = 0.5$  mm,  $K = 0.021 \mu\text{l}^{-1}$  and  $p = 15$  mmHg, we obtain  $E = 4.15$  MPa. This is in line with experimentally determined values, see Table 1 in [48].

We note that the above expressions imply that the Young's modulus  $E$  increases (and the ocular compliance  $C$  decreases) as IOP grows. Thus, by assuming a constant values of ocular rigidity  $K$ , we effectively account for corneo-scleral tissue stiffening in response to tissue strain.

## Solution procedure

The manipulations needed to find a solution of the mathematical model described in the previous section are quite elaborated, and a detailed description is reported in the Supplementary Material. Here we just outline the main steps in the following.

The first step of the solution process consists in passing from the time domain to the frequency domain, by writing

$$\mathbf{u}(x, t) = \text{Re} \left( e^{\zeta t} \mathbf{u}(x, \zeta) \right), \quad q(x, t) = \text{Re} \left( e^{\zeta t} q(x, \zeta) \right), \quad (21) \quad \{\text{eq: 21}\}$$

where  $\zeta \in \mathbb{C} \setminus \{0\}$  is a complex frequency. The imaginary part of  $\zeta$  is the angular frequency of oscillation of the solution, while the opposite of the real part yields the rate of decay of the solution.

We expand pressure increment and displacement using scalar and vector spherical harmonics, respectively (for the detailed definitions we refer to the Supplementary Material and [51, 52]). Specifically, we write

$$\mathbf{q}(\mathbf{r}) = \sum_{\ell \geq 0} \sum_{-\ell \leq m \leq \ell} Q_{\ell m}(r, \zeta) Y_{\ell m}(\hat{\mathbf{r}}), \quad (22) \quad \{\text{eq: 10}\}$$

and

$$\mathbf{u}(\mathbf{r}, \zeta) = \sum_{\ell \geq 0} \sum_{-\ell \leq m \leq \ell} \mathbf{u}_{\ell m}(\mathbf{r}, \zeta), \quad (23) \quad \{\text{eq: 11}\}$$

where

$$\mathbf{u}_{\ell m}(\mathbf{r}, \zeta) = P_{\ell m}(r, \zeta) \mathbf{p}_{\ell m}(\hat{\mathbf{r}}) + B_{\ell m}(r, \zeta) \mathbf{b}_{\ell m}(\hat{\mathbf{r}}) + C_{\ell m}(r, \zeta) \mathbf{c}_{\ell m}(\hat{\mathbf{r}}). \quad (24) \quad \{\text{eq: 12}\}$$

Here  $\mathbf{r}$  represents the position with respect to the center of the sphere;  $r = |\mathbf{r}|$  is the distance from the center, and  $\hat{\mathbf{r}}$  is the unit vector pointing in the direction of  $\mathbf{r}$ . The functions  $Y_{\ell m}$  are the spherical harmonics, while  $\mathbf{p}_{\ell m}$ ,  $\mathbf{b}_{\ell m}$  and  $\mathbf{c}_{\ell m}$  are the vector spherical harmonics, defined on the unit sphere. We recall that  $\mathbf{p}_{\ell m}$  are radial vectors and  $\mathbf{b}_{\ell m}$  and  $\mathbf{c}_{\ell m}$  are vectors tangential to the sphere surface and orthogonal to each other.

As shown in the Supplementary Material, the substitution of (21)-(24) into the motion equations (??), (3), and (4) yields a system of ordinary differential equations for the coefficients  $Q_{\ell m}$ ,  $P_{\ell m}$ ,  $B_{\ell m}$  and  $C_{\ell m}$ . For  $\ell = 0$ , this system admits only the trivial solution. For  $\ell \geq 1$ , bounded solutions have the general form:

$$\begin{aligned} Q_{\ell m}(r, \zeta) &= -C_{\ell m}^{(1)} \frac{\rho_v R \zeta^2}{\ell} \left( \frac{r}{R} \right)^\ell, \\ P_{\ell m}(r, \zeta) &= C_{\ell m}^{(1)} \left( \frac{r}{R} \right)^{\ell-1} + C_{\ell m}^{(2)} \left( \frac{r}{R} \right)^{-1} j_\ell \left( a(\zeta) \frac{r}{R} \right), \\ B_{\ell m}(r, \zeta) &= C_{\ell m}^{(1)} \frac{s_\ell}{\ell} \left( \frac{r}{R} \right)^{\ell-1} + \frac{C_{\ell m}^{(2)}}{s_\ell} \left( a(\zeta) j_{\ell-1} \left( a(\zeta) \frac{r}{R} \right) - \ell \left( \frac{r}{R} \right)^{-1} j_\ell \left( a(\zeta) \frac{r}{R} \right) \right), \\ C_{\ell m}(r, \zeta) &= C_{\ell m}^{(3)} j_\ell \left( a(\zeta) \frac{r}{R} \right), \end{aligned} \quad (25) \quad \{\text{eq: 66}\}$$



It is made available under a [CC-BY 4.0 International license](https://creativecommons.org/licenses/by/4.0/) .

where  $C_{\ell m}^{(1)}$ ,  $C_{\ell m}^{(2)}$  and  $C_{\ell m}^{(3)}$  are three arbitrary constants,  $a(\zeta) = iR\zeta\sqrt{\rho_v/G(\zeta)}$ , and  $j_\ell$  is the  $\ell$ -th spherical Bessel function, defined by  $j_\ell(x) = \sqrt{\pi/(2x)}J_{\ell+1/2}(x)$ .

Upon substitution of the solution (25) into the motion equations (2) that govern the dynamics of the corneo-scleral shell we obtain two characteristic equations, namely,

$$\begin{pmatrix} m_{11}(\ell, \zeta) & m_{12}(\ell, \zeta) \\ m_{21}(\ell, \zeta) & m_{22}(\ell, \zeta) \end{pmatrix} \begin{pmatrix} C_{\ell m}^{(1)} \\ C_{\ell m}^{(2)} \end{pmatrix} = \mathbf{0}, \quad (26) \quad \{\text{eq: e}\}$$

and

$$m_{33}(\ell, z)C_{\ell m}^{(3)} = 0, \quad (27) \quad \{\text{eq: e}\}$$

where  $m_{ij}(\ell, \zeta)$  are complex coefficients, the expressions of which are reported in the Supplementary Material. Vibration frequencies are determined by imposing either that the determinant of the matrix in (26) vanishes, that is,

$$m_{11}(\ell, \zeta)m_{22}(\ell, \zeta) - m_{21}(\ell, \zeta)m_{12}(\ell, \zeta) = 0, \quad (28) \quad \{\text{chara}\}$$

or

$$m_{33}(\ell, \zeta) = 0. \quad (29) \quad \{\text{chara}\}$$

The characteristic equations (28) and (29) define two families of vibration modes.

Modes in the first family are a linear combination of the harmonics  $\mathbf{p}_{\ell m}$  and  $\mathbf{b}_{\ell m}$ , through the functions  $P_{\ell m}$  and  $B_{\ell m}$ , which depends on the coefficients  $C_{\ell m}^{(1)}$  and  $C_{\ell m}^{(2)}$ . These coefficients are obtained by solving (26). For this class of modes, the displacement field on the shell has both normal and tangential components.

The second family, involves only the vector spherical harmonics  $\mathbf{c}_{\ell m}$ , and the corresponding velocity field is tangential to the shell surface.

For  $\ell = 1$ , modes in the first family are singular at the origin [15, 52], and hence must be discarded. Still for  $\ell = 1$ , vibration modes in the second family have the special property that every concentric sphere within the ball undergoes a rigid oscillatory rotation. Such modes have been already studied in [15], and do not entail any deformation of the shell. As such, they are not detectable by any method based on measuring the deformation of the corneoscleral shell, and hence they are not of interest in the context of the present investigation.

We remark that the index  $m$  does not appear in the characteristic equations. This is because harmonics having the same  $\ell$ , but different  $m$ , can be transformed into each other through a rotation, which makes them physically equivalent [15]. For this reason, we focus our attention on the case  $m = 0$ .

In Fig. 2 we represent the velocity of the two lowest-frequency modes ( $\ell = 2$ ) in the first family. The first mode involves mainly bending of the shell, whereas the second involves stretching, since the velocity field is almost tangential. In the figures we show only a meridian section of the sphere, since the motion is axisymmetric.

Fig. 3 shows is a three-dimensional representation of the vibration mode for  $\ell = 2$  of the second family. This mode of oscillation is purely tangential and involves a twist deformation of the shell.

It is made available under a [CC-BY 4.0 International license](https://creativecommons.org/licenses/by/4.0/).

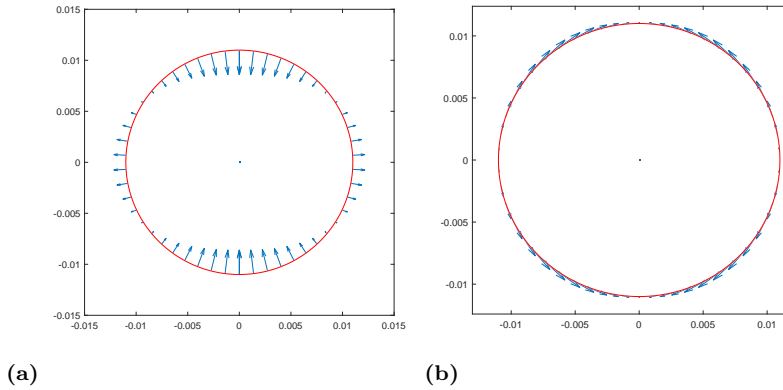

**Fig 2.** Velocity fields on the boundary corresponding to the two eigenvalues from (28) for  $\ell = 2$  and  $m = 0$ .

{fig:e

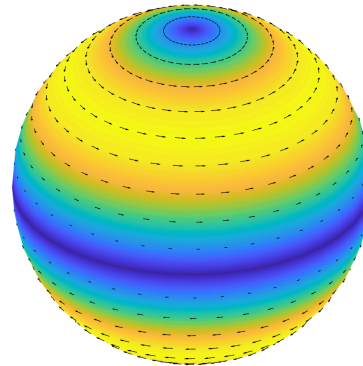

**Fig 3.** Three-dimensional rendering of the velocity field on the boundary corresponding to the eigenvalue from (29) for  $\ell = 2$  and  $m = 0$ .

{fig:e

## Validation of the model

291

In [23], Salimi et al. studied free vibrations of the eyeball using a FEM model. To calibrate their model, they performed experiments on the vibrations of a water-filled elastic ball. In this section we validate our analytical model against these experimental measurements.

292

293

294

295

The ball was filled with water through an injector and the internal pressure was measured with a pressure gauge. The ball was hanged to an elastic cord, so that it could freely vibrate. A little hammer was used to generate ball vibrations, which were measured using an accelerometer. The authors determined the vibration spectrum in response to the excitation input, from which they inferred the main natural oscillation frequencies of the sphere. They performed experiments for three different values of the internal water pressure.

296

297

298

299

300

301

302

A comparison between their experimental findings and the results predicted by our model is shown in Table 2, where we report the vibration frequencies of the lowest mode, with  $\ell = 2$ . In our computations, we used to the following parameters [23]: sphere radius 25 mm; thickness of the wall 4 mm; Young's modulus 4.8 MPa, Poisson coefficient 0.45; shell density 1200 kg/m<sup>3</sup>; water density 1000 kg/m<sup>3</sup>; water viscosity 10<sup>-3</sup> Pa · s.

303

304

305

306

307

The error of the model is always lower than 10%. Both experiments and model

308

It is made available under a [CC-BY 4.0 International license](https://creativecommons.org/licenses/by/4.0/).

| Pressure                 | 13.7 kPa | 34.5 kPa | 62.0 kPa |
|--------------------------|----------|----------|----------|
| Experimental frequencies | 187 Hz   | 195 Hz   | 206 Hz   |
| Computed frequencies     | 176 Hz   | 180 Hz   | 187 Hz   |
| Error %                  | 5.88%    | 8.33%    | 9.22%    |

**Table 2.** Comparison between the model predictions and Salimi et al.'s [23] experiments on water-filled elastic ball.

predict an approximately linear dependency of the frequency from the pressure. Given some possible experimental uncertainty regarding material properties of the sphere we regard this agreement acceptable. The increasing error with rising pressure can be attributed to the nonlinear behavior of rubber, leading to an increasing Young's modulus, compared to the reference value of 4.8 MPa used in the calculations, as the internal pressure grows.

## Results

We begin by showing the lowest frequency eigenvalues of the system, obtained by solving the characteristic equations (28) and (29), with  $m = 0$  and  $\ell = 2$ . As discussed above, these eigenvalues are our main interest in this work. Results are reported in Fig. 4 for various cases, relative to different materials filling the eyebulb. The vertical and horizontal axes represent the imaginary and the real part of the eigenvalue  $\zeta$ , respectively; these correspond, in the order, to the oscillation frequency and to the damping ratio. Empty circles represent the vibration frequencies of the empty shell; in this case damping vanishes as the shell is assumed to have a purely elastic behavior and does not dissipate energy by itself. Mathematically, this implies that the corresponding eigenvalues are purely imaginary. The eigenvalue with the lowest frequency corresponds to the bending mode, shown in Figure 2a, obtained as one of the solutions of (28). The second eigenvalue (frequency of  $\approx 1000$  Hz) corresponds to the purely tangential mode, shown in Fig. 3 and obtained by solving equation (29). The highest frequency eigenvalue corresponds to the third solution of (28), whose associated mode is shown in Figure 2b.

The presence of a fluid inside the shell increases the total mass of the system and, as can be seen in the figure, lowers considerably the vibration frequencies. Moreover, the system becomes dissipative when it contains a viscous material. This implies that all corresponding eigenvalues are now complex, with the real part being negative, which corresponds to dissipation. In all cases, the lowest frequency is associated with the mode corresponding to the first root of the characteristic equation of (28) (Fig. 2a), which is thus the mode we will mostly focus our attention on in the following. This is because this mode is the one which will survive the longest time, after excitation of the eye bulb vibration.

The various points with different colors in Fig. 4 correspond to cases of clinical interest, in which the eyeball is filled with healthy vitreous (blue), water (red) and silicone oil (yellow). The case of water is representative of a completely liquefied vitreous, and silicone oils are often used as vitreous replacement fluids after vitrectomy. The mechanical properties adopted for each case are reported in the caption of Fig. 4. The figure shows that the frequencies of oscillation are weakly affected by the material filling eyebulb. On the contrary, the damping rate strongly depends on the viscosity of the filling material, being much higher for silicone oil and the real vitreous than for water.

In Fig. 5 we investigate the dependency of the vibration frequency of the less damped mode on IOP, for different values of ocular rigidity  $K$ . The oscillation frequency increases markedly as IOP is raised from very small values up to 80 mmHg

It is made available under a [CC-BY 4.0 International license](https://creativecommons.org/licenses/by/4.0/).

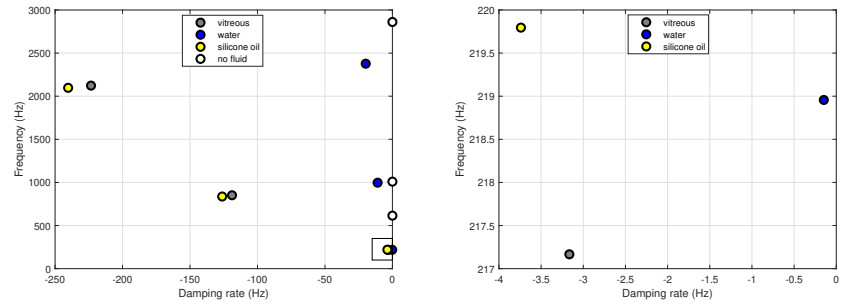

**Fig 4.** Comparison between the complex frequencies for different materials filling the vitreous cavity. Water: density of  $1000 \text{ kg/m}^3$  and viscosity of  $10^{-3} \text{ Pa} \cdot \text{s}$ ; vitreous body: values from Table 1 and density of  $1000 \text{ kg/m}^3$ ; silicone oil: density of  $970 \text{ kg/m}^3$  and viscosity of  $0.5 \text{ Pa} \cdot \text{s}$ .

{fig:1

(which is an exceedingly high value). The dependency is particularly strong at low IOP. The results reported Fig. 5 also show that ocular stiffness has a significant impact on the vibration frequencies, especially at large values of IOP. The intermediate curve, which corresponds to the value of ocular rigidity proposed by Friedenwald, is in good agreement the curve from Fig. 5 of Ref. [8].

In Fig. 5(b) we report the same curves as on Fig. 5(a) but in a log-log plot. This shows that, on such a plane, the curves become straight lines, which means that the oscillation frequency depends on IOP according to a power law. Moreover, the curves are almost parallel to each other. In the case of the empty shell, an argument based on dimensional analysis shows that, under the assumption that the ocular rigidity  $K$  is constant, i.e. Young's modulus grows linearly with IOP according to (20), the oscillation frequency depends on the square root of IOP. This is confirmed by our solution. Interestingly, the angular coefficient of the curves in Fig. 5(b) is very close to  $1/2$ , which implies that the presence of vitreous within the sphere does not modify significantly this dependency.

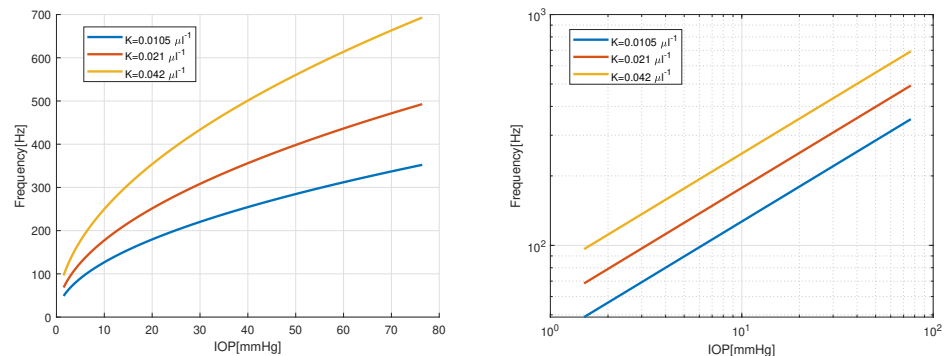

**Fig 5.** Dependency of the frequency of oscillation of the slowest decaying mode as a function of IOP, for 3 different values of the ocular rigidity  $K$ . (a) linear scales, (b) log-log scales.

{fig:1

We point out that, according to equation (20), Friedenwald's law (11) implies that the corneo-scleral tissue stiffens with stretch. To understand the importance of such an effect, we compare in Fig. 6 the IOP-frequency curve for  $K = 0.021 \mu\text{l}^{-1}$  from Fig. 5

It is made available under a [CC-BY 4.0 International license](https://creativecommons.org/licenses/by/4.0/).

with the curve obtained by assuming a constant Young modulus (and thus also a constant ocular compliance  $C$ ), determined by equation (20) for  $p = 15$  mmHg. The comparison between the two curves shows that neglecting ocular stiffening results into a substantial underestimation of the change of vibration frequency with IOP. This confirms the importance of tissue stiffening effects, which have been already pointed out by Alarm et al. [9].

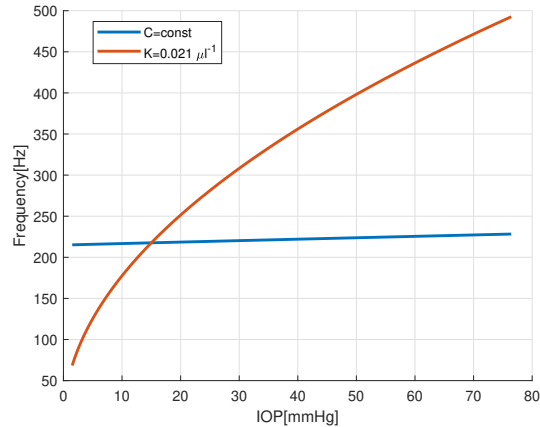

**Fig 6.** Dependency of the frequency of oscillation of the slowest decaying mode as a function of IOP. Comparison between the model with constant ocular compliance  $C$  (blue) and the model with constant ocular rigidity  $K$  (red).

The effect of viscosity on the vibration damping rate is shown in Fig. 7, for the case in which the eyeball is filled with a viscous fluid. The viscosity in the plot is varied from  $10^{-6}$  m<sup>2</sup>/s, which is representative of water, to  $10^{-3}$  m<sup>2</sup>/s, which is a typical viscosity of silicone oils used as tamponade fluids after vitrectomy.

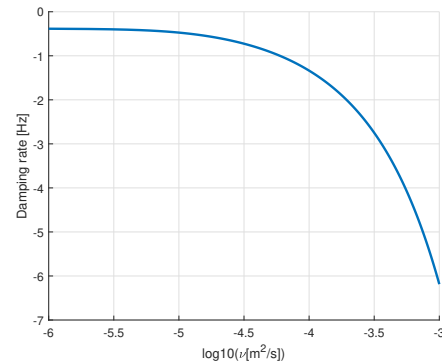

**Fig 7.** Damping of the slowest decaying mode as a function of fluid viscosity.

Finally, in Fig. 8 we plot contour lines of the frequency (a) and damping rate (b) of the slowest decaying mode as a function of IOP and ocular rigidity  $K$ . In the figure, IOP is varied over a very wide range of values and  $K$  is modified by  $\pm 50\%$  from the baseline value  $0.021 \mu\text{l}^{-1}$ . The plots show that at low values of IOP, ocular rigidity has little effect on the eigenvalues of the system, as the contour lines are almost vertical. As IOP increases, ocular rigidity becomes progressively more relevant

It is made available under a [CC-BY 4.0 International license](https://creativecommons.org/licenses/by/4.0/).

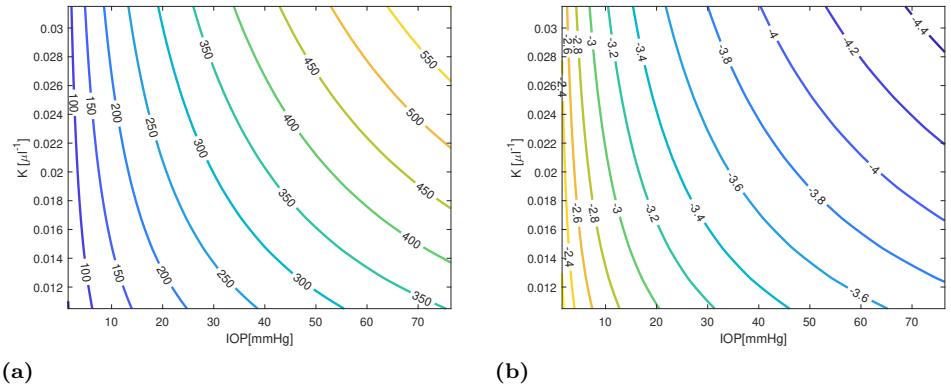

(a) (b)  
**Fig 8.** Frequency (a) and damping rate (b) of the slowest decaying mode as a function of IOP and ocular rigidity  $K$ .

{fig: 8}

## Discussion and conclusions

385

We have developed a mechanical model of the vibrations of the eyeball, which describes the cornea and the sclera as a thin elastic shell with pre-stress, and the vitreous humor as a viscoelastic material. The model takes into account the effect of the pre-stress through a consistent linearization, which leads to a more rigorous set of equations than previous authors have used.

386  
387  
388  
389  
390

We have solved the set of linear evolution equations resulting from the model using a series expansion of pressure increment and displacement in terms of scalar and vector spherical harmonics. For each term of the series, we have obtained an eigenvalue problem consisting of three nonlinear algebraic equations, which we have solved numerically. We focused on the bending modes with the lowest damping rate, which are the most relevant for our application. We have evaluated the natural vibration frequencies and damping rates, using parameters significant for the eye ball dynamics. In particular, we have used ocular stiffness to assess the mechanical properties of the corneo-scleral shell, which we believe is a better approach than the use of a value of Young's modulus taken from experiments on scleral tissue. This is for two reasons. First, scleral properties are known to be spatially variable and, moreover, they are significantly different from those of the cornea. The use of a value of Young's modulus based on inflation tests provides a meaningful "average" value. Secondly, the use of Friedenwald's law (11), somehow accounts for the nonlinearity of the corneoscleral tissue.

391  
392  
393  
394  
395  
396  
397  
398  
399  
400  
401  
402  
403  
404

The existing experimental and numerical estimates of the vibrations of the eyeball provide extremely sparse values (see table 1 of [37]), ranging from 30 to 800 Hz. This extreme uncertainty probably reflects inaccuracies of experimental techniques or difficulty in data interpretation, more than real variability from case to case. Our model shows that the slowest decaying mode of oscillation that involves motion of the eye bulb (and can thus be observed and measured) has frequencies ranging from  $\approx 80$  to  $\approx 300$  Hz, depending on the value of the IOP. These values are well within the range of measurements. Moreover, the good agreement with the experimental results of Salimi et al. [23], performed on a fluid filled rubber ball in controlled conditions, is reassuring about the reliability of our predictions.

405  
406  
407  
408  
409  
410  
411  
412  
413  
414

The increase of the vibration frequencies with IOP is of particular interest in the present context, as it is at the basis of acoustic tonometry. This dependency has two origins: "geometric" stiffening, due to an increase of pre-stress, and "material" stiffening, due to the nonlinearity of the stress-strain curve of the sclera. Our results

415  
416  
417  
418

indicate that the latter effect is by far dominant, as shown by Fig. 6. 419

Our results also predict a significant dependency of bulb dynamics on the 420  
mechanical properties of the corneo-scleral shell and, in particular, on ocular rigidity  $K$ : 421  
the natural frequencies of oscillation of the eye increase with  $K$ , i. e. with increasing 422  
stiffness of the ocular tissues. Fig. 8 shows, however, that the dependency of oscillation 423  
frequencies on ocular rigidity is important only at relatively large values of IOP and, 424  
close to physiological conditions (IOP of  $\approx 15$  mmHg), IOP is by far the main 425  
determinant of ocular vibration frequencies. This is an important finding, since it 426  
confirms that measurement of natural vibration frequencies of the eye is a promising 427  
method to measure IOP. In particular, longitudinal measurements on a single subject 428  
have the potential to provide reliable estimates of IOP changes. 429

In this work we have for the first time accounted to the effect of the vitreous gel on 430  
the dynamics of the eye bulb. Results show that the material filling the eye ball 431  
contributes significantly to determine the frequencies of oscillation, mostly due to an 432  
added mass effect: an eye filled with gas, which is much lighter than the vitreous, would 433  
have higher natural frequencies of oscillation. The material property that matters for 434  
the inertia of the system is, obviously, density. On the other hand, our results show that 435  
the elastic and viscous properties of the material filling the vitreous chamber have little 436  
effect on ocular vibration frequencies. However, viscosity plays a major role in 437  
determining the damping rate of the system. This confirms the speculation that the 438  
vitreous body might have a protecting role on the internal ocular tissues, effectively 439  
acting as a damper. This might be particularly relevant in the case of traumas. 440

Our results may be improved in several aspects. We may take into account the 441  
spatial variability of shell properties and the details of eye geometry, which is not 442  
exactly a sphere. Accounting for these effects to model the dynamics of the ocular bulb 443  
would, however, rule out the possibility of adopting analytical methods, and would 444  
require a fully numerical approach. As a result, this would make it difficult to capture 445  
the role of the key parameters. In this respect, we think that idealized models, such as 446  
the one presented here, represent a very valuable complementary approach. This is 447  
because analytical models easily elucidate relationships between the quantities at play, 448  
allowing to capture the essential features of the problem. 449

## Acknowledgments 450

GT acknowledges support from the Italian Ministry of University and Research (MIUR) 451  
through project PRIN 2022NNTZNM DISCOVER, and the “Departments of Excellence” 452  
initiative. Support from INdAM-GNFM is also acknowledged. 453

RR thanks prof. Ross C. Ethier (Georgia Tech., USA) for some useful discussion and 454  
for suggesting the use of pressure-volume relationships to estimate the elastic properties 455  
of the eyebulb. 456

The authors thank Alessia Ruffini (University of Genoa) for drawing Figure 1. 457

## References

1. Tram NK, Maxwell CJ, Swindle-Reilly KE. Macro- and Microscale Properties of the Vitreous Humor to Inform Substitute Design and Intravitreal Biotransport. *Current Eye Research*. 2021;46(4):429–444. doi:10.1080/02713683.2020.1826977.
2. Dvoriashyna M, Foss AJE, Gaffney EA, Repetto R. A Mathematical Model of Aqueous Humor Production and Composition. *Investigative Ophthalmology & Visual Science*. 2022;63(9):1. doi:10.1167/iovs.63.9.1.

3. Tamm ER, Braunger BM, Fuchshofer R. Chapter Eighteen - Intraocular Pressure and the Mechanisms Involved in Resistance of the Aqueous Humor Flow in the Trabecular Meshwork Outflow Pathways. In: Hejtmancik JF, Nickerson JM, editors. *Progress in Molecular Biology and Translational Science*. vol. 134 of *Molecular Biology of Eye Disease*. Academic Press; 2015. p. 301–314.
4. Kwon YH, Fingert JH, Kuehn MH, Alward WLM. Primary Open-Angle Glaucoma. *The New England journal of medicine*. 2009;360(11):1113–1124. doi:10.1056/NEJMra0804630.
5. Cook JA, Botello AP, Elders A, Ali AF, Azuara-Blanco A, Fraser C, et al. Systematic review of the agreement of tonometers with Goldmann applanation tonometry. *Ophthalmology*. 2012;119(8):1552–1557.
6. Farhood QK. Comparative evaluation of intraocular pressure with an air-puff tonometer versus a Goldmann applanation tonometer. *Clinical Ophthalmology (Auckland, NZ)*. 2013;7:23. doi:10.2147/OPTH.S38418.
7. Da Silva F, Lira M. Intraocular pressure measurement: A review. *Survey of Ophthalmology*. 2022;67(5):1319–1331. doi:10.1016/j.survophthal.2022.03.001.
8. Hamelink JM, Cloud GL. Ocular Tonometry Through Sonic Excitation and Laser Doppler Velocimetry. *Journal of Biomechanical Engineering*. 1979;101(4):267–270. doi:10.1115/1.3426256.
9. Alam SK, Richards DW, Parker KJ. Detection of intraocular pressure change in the eye using sonoelastic Doppler ultrasound. *Ultrasound in Medicine & Biology*. 1994;20(8):751–758. doi:10.1016/0301-5629(94)90032-9.
10. von Freyberg A, Sorg M, Fuhrmann M, Kreiner CF, Pfannkuche J, Klink T, et al. Acoustic Tonometry: Feasibility Study of a New Principle of Intraocular Pressure Measurement. *Journal of Glaucoma*. 2009;18(4):316–320. doi:10.1097/IJG.0b013e3181845661.
11. Osmers J, Patzkó Á, Hoppe O, Sorg M, Von Freyberg A, Fischer A. The influence of intraocular pressure on the damping of a coupled speaker–air–eye system. *Journal of Sensors and Sensor Systems*. 2018;7(1):123–130. doi:10.5194/jsss-7-123-2018.
12. Osmers J, Hoppe O, Strzalkowska A, Strzalkowski P, Patzkó Á, Arnold S, et al. Results of First In Vivo Trial of an Acoustic Self-Tonometer. *Translational Vision Science & Technology*. 2020;9(9):18. doi:10.1167/tvst.9.9.18.
13. Kim D, Chung Y, Yeon Y, Cho H, Lim HW, Park J, et al. A pilot study for intraocular pressure measurements based on vibroacoustic parameters. *Scientific Reports*. 2021;11(1):1264. doi:10.1038/s41598-020-80321-1.
14. Rossi T, Boccassini B, Esposito L, Iossa M, Ruggiero A, Tamburrelli C, et al. The Pathogenesis of Retinal Damage in Blunt Eye Trauma: Finite Element Modeling. *Investigative Ophthalmology & Visual Science*. 2011;52(7):3994. doi:10.1167/iovs.10-6477.
15. Meskauskas J, Repetto R, Siggers JH. Oscillatory motion of a viscoelastic fluid within a spherical cavity. *Journal of Fluid Mechanics*. 2011;685:1–22. doi:10.1017/jfm.2011.263.



16. Repetto R, Tatone A, Testa A, Colangeli E. Traction on the retina induced by saccadic eye movements in the presence of posterior vitreous detachment. *Biomechanics and Modeling in Mechanobiology*. 2011;10(2):191–202. doi:10.1007/s10237-010-0226-6.
17. Di Michele F, Tatone A, Romano MR, Repetto R. A mechanical model of posterior vitreous detachment and generation of vitreoretinal tractions. *Biomechanics and Modeling in Mechanobiology*. 2020;19(6):2627–2641. doi:10.1007/s10237-020-01360-1.
18. Lamb H. On the Vibrations of an Elastic Sphere. *Proceedings of the London Mathematical Society*. 1881;s1-13(1):189–212. doi:10.1112/plms/s1-13.1.189.
19. Lamb H. On the Vibrations of a Spherical Shell. *Proceedings of the London Mathematical Society*. 1882;s1-14(1):50–56. doi:10.1112/plms/s1-14.1.50.
20. Rand R, DiMaggio F. Vibrations of Fluid-Filled Spherical and Spheroidal Shells. *The Journal of the Acoustical Society of America*. 1967;42(6):1278–1286.
21. Kuo KA, Hunt HEM, Lister JR. Small oscillations of a pressurized, elastic, spherical shell: Model and experiments. *Journal of Sound and Vibration*. 2015;359:168–178. doi:10.1016/j.jsv.2015.08.021.
22. Coquart L, Depeursinge C, Curnier A, Ohayon R. A fluid-structure interaction problem in biomechanics: Prestressed vibrations of the eye by the finite element method. *Journal of Biomechanics*. 1992;25(10):1105–1118. doi:10.1016/0021-9290(92)90067-B.
23. Salimi S, Simon Park S, Freiheit T. Dynamic Response of Intraocular Pressure and Biomechanical Effects of the Eye Considering Fluid-Structure Interaction. *Journal of Biomechanical Engineering*. 2011;133(9):091009. doi:10.1115/1.4005166.
24. Aloy MÁ, Adsua JE, Cerdá-Durán P, Obergaulinger M, Esteve-Taboada JJ, Ferrer-Blasco T, et al. Estimation of the mechanical properties of the eye through the study of its vibrational modes. *PLOS ONE*. 2017;12(9):e0183892. doi:10.1371/journal.pone.0183892.
25. Shih PJ, Wu SJ, Sung YH, Tung YT, Chang CY, Hatamie S, et al. Eye orbit effects on eyeball resonant frequencies and acoustic tonometer measurements. *Scientific Reports*. 2022;12(1):4883. doi:10.1038/s41598-022-08874-x.
26. Tomassetti G. A direct, coordinate-free approach to the mechanics of thin shells; 2023.
27. Destrade M, Ogden RW, Saccomandi G. Small Amplitude Waves and Stability for a Pre-Stressed Viscoelastic Solid. *Z angew Math Phys*. 2009;60(3):511–528. doi:10.1007/s00033-008-7147-6.
28. Pipkin AC. *Lectures on Viscoelasticity Theory*. vol. 7 of Applied Mathematical Sciences. New York: Springer; 1972.
29. Tomassetti G. A Direct, Coordinate-Free Approach to the Mechanics of Thin Shells; 2023.
30. Lamb H. On the Vibrations of a Spherical Shell. *Proceedings of the London Mathematical Society*. 1882;s1-14(1):50–56. doi:10.1112/plms/s1-14.1.50.

31. Love AEH. The Free and Forced Vibrations of an Elastic Spherical Shell Containing a given Mass of Liquid. *Proceedings of the London Mathematical Society*. 1887;s1-19(1):170–207. doi:10.1112/plms/s1-19.1.170.
32. Rand R, DiMaggio F. Vibrations of Fluid-Filled Spherical and Spheroidal Shells. *The Journal of the Acoustical Society of America*. 1967;42(6):1278–1286. doi:10.1121/1.1910717.
33. Engin AE, Liu YK. Axisymmetric Response of a Fluid-Filled Spherical Shell in Free Vibrations. *Journal of Biomechanics*. 1970;3(1):11–22. doi:10.1016/0021-9290(70)90047-3.
34. Bai MR, Wu K. Free Vibration of a Thin Spherical Shell Containing a Compressible Fluid. *The Journal of the Acoustical Society of America*. 1994;95(6):3300–3310. doi:10.1121/1.409992.
35. Su TC. The Effect of Viscosity on Free Oscillations of Fluid-Filled Spherical Shells. *Journal of Sound and Vibration*. 1981;74(2):205–220. doi:10.1016/0022-460X(81)90504-6.
36. Kuo KA, Hunt HEM, Lister JR. Small Oscillations of a Pressurized, Elastic, Spherical Shell: Model and Experiments. *Journal of Sound and Vibration*. 2015;359:168–178. doi:10.1016/j.jsv.2015.08.021.
37. Shih PJ, Guo YR. Resonance Frequency of Fluid-Filled and Prestressed Spherical Shell—A Model of the Human Eyeball. *The Journal of the Acoustical Society of America*. 2016;139(4):1784–1792. doi:10.1121/1.4945733.
38. Mason WP. *Electromechanical Transducers and Wave Filters*. New York: Van Nostrand; 1942.
39. Jesus DA, Kedzia R, Iskander DR. Precise measurement of scleral radius using anterior eye profilometry. *Contact Lens and Anterior Eye*. 2017;40(1):47–52. doi:10.1016/j.clae.2016.11.003.
40. Vurgese S, Panda-Jonas S, Jonas JB. Scleral thickness in human eyes. *PloS one*. 2012;7(1):e29692.
41. Herndon LW. Central Corneal Thickness in Normal, Glaucomatous, and Ocular Hypertensive Eyes. *Archives of Ophthalmology*. 1997;115(9):1137. doi:10.1001/archophth.1997.01100160307007.
42. Su X, Vesco C, Fleming J, Choh V. Density of Ocular Components of the Bovine Eye. *Optometry and Vision Science*. 2009;86(10):1187–1195. doi:10.1097/OPX.0b013e3181baaf4e.
43. Nickerson CS, Park J, Kornfield JA, Karageozian H. Rheological properties of the vitreous and the role of hyaluronic acid. *Journal of biomechanics*. 2008;41(9):1840–1846.
44. Meskauskas J, Repetto R, Siggers JH. Oscillatory motion of a viscoelastic fluid within a spherical cavity. *J Fluid Mech*. 2011;685:1–22. doi:10.1017/jfm.2011.263.
45. Friedenwald JS. Contribution to the Theory and Practice of Tonometry\*. *American Journal of Ophthalmology*. 1937;20(10):985–1024. doi:10.1016/S0002-9394(37)90425-2.

46. Silver DM, Geyer O. Pressure-volume relation for the living human eye. *Current eye research*. 2000;20(2):115–120.
47. Ethier CR, Johnson M, Ruberti J. Ocular Biomechanics and Biotransport. *Annu Rev Biomed Eng*. 2004;6(1):249–273. doi:10.1146/annurev.bioeng.6.040803.140055.
48. Sigal IA, Flanagan JG, Tertinegg I, Ethier CR. Finite Element Modeling of Optic Nerve Head Biomechanics. *Investigative Ophthalmology & Visual Science*. 2004;45(12):4378. doi:10.1167/iovs.04-0133.
49. Hamilton KE, Pye DC. Young’s Modulus in Normal Corneas and the Effect on Applanation Tonometry. *Optometry and Vision Science*. 2008;85(6):445–450. doi:10.1097/OPX.0b013e3181783a70.
50. Sherwood JM, Boazak EM, Feola AJ, Parker K, Ethier CR, Overby DR. Measurement of Ocular Compliance Using iPerfusion. *Front Bioeng Biotechnol*. 2019;7:276. doi:10.3389/fbioe.2019.00276.
51. Arfken G, Weber H. *Mathematical methods for physicists*, 5th Edit; 2001.
52. Quartapelle L, Verri M. On the spectral solution of the three-dimensional Navier-Stokes equations in spherical and cylindrical regions. *Computer physics communications*. 1995;90(1):1–43.
